# Supplementary material for: Precise diagnosis in different scenarios using photoacoustic and fluorescence imaging with dual-modality nanoparticles
Source: Royal Society of Chemistry journal article supplement (doi:10.1039/c6nr03809c), 2016-01-01
Supplement: c6nr03809c1.pdf [file c6nr03809c1.pdf]

## Supplementary Information

### Precise diagnosis in different scenarios using photoacoustic and fluorescence imaging with a dual-modality nanoparticle

Dong Peng,<sup>†a,b</sup> Yang Du,<sup>†b,d</sup> Yiwen Shi,<sup>c</sup> Duo Mao,<sup>e</sup> Xiaohua Jia,<sup>b,d</sup> Hui Li,<sup>b</sup> Yukun Zhu,<sup>b</sup>  
Kun Wang,<sup>\*b,d</sup> and Jie Tian<sup>\*a,b,d</sup>

<sup>a</sup>Engineering Research Center of Molecular and Neuro Imaging of the Ministry of Education & School of Life Science and  
Technology, Xidian University, Xi'an, 710071, China

<sup>b</sup>Key Laboratory of Molecular Imaging, Institute of Automation, Chinese Academy of Sciences, Beijing, 100190, China

<sup>c</sup>Department of Biomedical Engineering, Shanghai Jiao Tong University, Shanghai, 200240, China

<sup>d</sup>Beijing Key Laboratory of Molecular Imaging, Beijing 100190, China

<sup>e</sup>Department of Chemical and Biomolecular Engineering, National University of Singapore, 4 Engineering Drive 4, 117576,  
Singapore

E-mail: [jie.tian@ia.ac.cn](mailto:jie.tian@ia.ac.cn), [kun.wang@ia.ac.cn](mailto:kun.wang@ia.ac.cn)

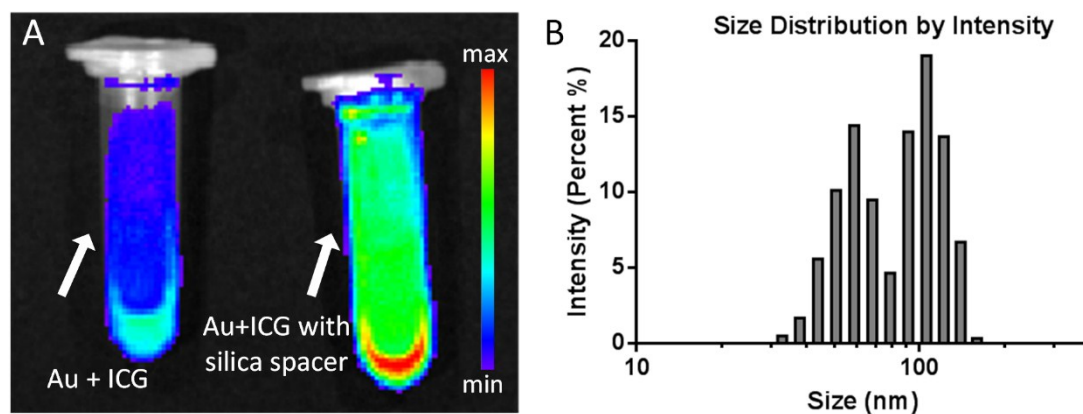

Figure S1. The characterization of ICG-loaded Au@SiO<sub>2</sub> NPs. (A) The comparison of fluorescent signal intensities between Au with ICG and ICG-loaded Au@SiO<sub>2</sub> NPs suspensions. (B) Dynamic Light Scattering (DLS) results of ICG-loaded Au@SiO<sub>2</sub> NPs.
